# Supplementary material
Source: publisher figshare collection journal article supplement (https://sage.figshare.com/ndownloader/files/18120776)
Supplement: Supplementary file 1 [file 18120776]

## Appendix A: Descriptive information about Australian and Canadian premiers

| Jurisdiction               | Woman premier, political party                   | Pathway to office* | Dates in premier's office (selection to departure) | Number of news stories | Male predecessor, political party              | Pathway to office* | Dates in premier's office (selection to departure) | Number of news stories |
|----------------------------|--------------------------------------------------|--------------------|----------------------------------------------------|------------------------|------------------------------------------------|--------------------|----------------------------------------------------|------------------------|
| Queensland, Australia      | <i>Anna Bligh</i> , Labor                        | Governing party    | 13 Sept. 2007 – 26 March 2012                      | 35                     | <i>Peter Beattie</i> , Labor                   | Election win       | 20 June 1998 – 13 Sept. 2007                       | 22                     |
| New South Wales, Australia | <i>Kristina Keneally</i> , Labor                 | Governing party    | 4 Dec. 2009 – 26 March 2011                        | 54                     | <i>Nathan Rees</i> , Labor                     | Governing party    | 14 Dec. 2008 – 7 Oct. 2009                         | 55                     |
| Tasmania, Australia        | <i>Lara Giddings</i> , Labor                     | Governing party    | 24 Jan. 2011 – 31 March 2014                       | 21                     | <i>David Bartlett</i> , Labor                  | Governing party    | 26 May 2008 – 23 Jan. 2011                         | 37                     |
| Queensland, Australia      | <i>Annastacia Palaszczuk</i> , Labor             | Election win       | 14 Feb. 2015 – present                             | 17                     | <i>Campbell Newman</i> , Liberal National      | Election win       | 26 March 2012 – 14 Feb. 2015                       | 51                     |
| New South Wales, Australia | <i>Gladys Berejiklian</i> , Liberal              | Governing party    | 20 Jan. 2017 – present                             | 35                     | <i>Mike Baird</i> , Liberal                    | Governing party    | 17 April 2014 – 19 Jan. 2017                       | 25                     |
| Alberta, Canada            | <i>Alison Redford</i> , Progressive Conservative | Governing party    | 7 October 2011 – 23 March 2014                     | 43                     | <i>Ed Stelmach</i> , Progressive Conservative  | Governing party    | 14 December 2006 – 7 Oct. 2011                     | 34                     |
| British Columbia, Canada   | <i>Christy Clark</i> , Liberal                   | Governing party    | 14 Mar. 2011 – 4. Aug. 2017                        | 42                     | <i>Gordon Campbell</i> , Liberal               | Election win       | 5 June 2001 – 14 March 2011                        | 36                     |
| Quebec, Canada             | <i>Pauline Marois</i> , Parti Québécois          | Election win       | 19 Sept. 2012 – 23 April 2014                      | 44                     | <i>Jean Charest</i> , Liberal                  | Election win       | 29 April 2003 – 19 Sept. 2012                      | 50                     |
| Ontario, Canada            | <i>Kathleen Wynne</i> , Liberal                  | Governing party    | 11 Feb. 2013 – 28 June 2018                        | 36                     | <i>Dalton McGuinty</i> , Liberal               | Election win       | 23 October 2003 – 11 Feb. 2013                     | 80                     |
| Alberta, Canada            | <i>Rachel Notley</i> , New Democratic            | Election win       | 24 May 2015-30 April 2019                          | 54                     | <i>Jim Prentice</i> , Progressive Conservative | Governing party    | 1 Sept. 2014 – 24 May 2015                         | 31                     |

\***Pathway to office:** we distinguished between those who attained the role of premier in the inter-election period by securing the leadership of a party in government (*governing party*), and those who brought an opposition party to victory in a general election (*election win*).
